# Supplementary material
Source: PubMed Central journal article supplement (PMC5602899)
Supplement: supp_fj.201700172R_Supplemental_Figure.pdf [file supp_fj.201700172R_Supplemental_Figure.pdf]

## Online Supplemental Materials

### ROR $\alpha$ modulates Semaphorin 3E transcription and neurovascular interaction in pathological retinal angiogenesis

Ye Sun<sup>a</sup>, Chi-Hsiu Liu<sup>a</sup>, Zhongxiao Wang<sup>a</sup>, Steven S. Meng<sup>a</sup>, Samuel B. Burnim<sup>a</sup>, John Paul SanGiovanni<sup>b</sup>, Theodore M. Kamenecka<sup>c</sup>, Laura A. Solt<sup>d</sup>, Jing Chen<sup>a,1</sup>

<sup>a</sup>Department of Ophthalmology, Harvard Medical School, Boston Children's Hospital, Boston, MA 02115;

<sup>b</sup>Section on Nutritional Neuroscience, National Institute on Alcohol Abuse and Alcoholism, Bethesda, MD 20892 and Department of Biochemistry and Molecular & Cellular Biology, Georgetown School of Medicine, Washington, DC 20057;

<sup>c</sup>Department of Molecular Medicine, <sup>d</sup>Department of Immunology and Microbiology, the Scripps Research Institute, Jupiter, FL 33458.

<sup>1</sup>To whom correspondence should be addressed to:

Email: jing.chen@childrens.harvard.edu; Tel: 617-919-2525.

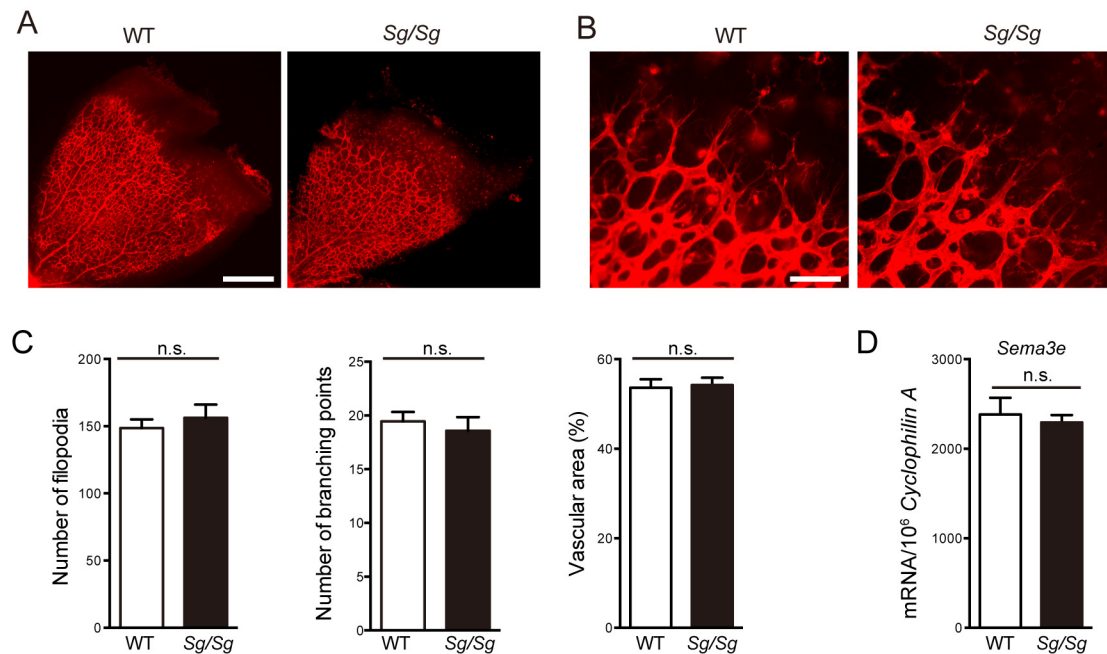

#### Figure S1 ROR $\alpha$ deficiency does not influence normal retinal vascular development.

**A.** Representative retinal whole-mount images from P5 *Sg/Sg* and WT mice were stained with isolectin IB<sub>4</sub> (red) for vasculature. **B.** Enlarged images of retinal whole-mounts from P5 *Sg/Sg* and WT mice showed retinal vascular growth front with endothelial cell filopodias. Retinas were stained with isolectin IB<sub>4</sub> (red) for vasculature. **C.** There were comparable numbers of retinal vessel tip cell filopodia, vascular branching points, and vascular areas between *Sg/Sg* and WT retinas at P5. Vascular areas were expressed as percentage of total retinal areas; **D.** There was no significant difference in the mRNA levels of *Sema3e* between *Sg/Sg* and WT retinas at P5; Data are presented as mean  $\pm$  SEM. no significance; n=5-6/group. Scale bar: 500  $\mu$ m (A) and 25  $\mu$ m (B).
